## Whole-genome sequencing identifies variants in *ANK1*, *LRRN1*, *HAS1*, and other genes and regulatory regions for stroke in type 1 diabetes

*Short title: Genome sequencing and stroke in type 1 diabetes*

Anni A. Antikainen (MSc in Tech)<sup>1,2,3</sup>, Jani K. Haukka (MSc)<sup>1,2,3</sup>, Anmol Kumar (PhD)<sup>1,2,3</sup>, Anna Syreeni (PhD)<sup>1,2,3</sup>, Stefanie Hägg-Holmberg (MD, DMSc)<sup>1,2,3</sup>, Anni Ylinen (MD)<sup>1,2,3</sup>, Elina Kilpeläinen (MSc)<sup>4</sup>, Anastasia Kytölä (MSc in Tech)<sup>4</sup>, Aarno Palotie (MD, PhD)<sup>4,5,6</sup>, Jukka Putaala (MD, DMSc)<sup>7</sup>, Lena M. Thorn (MD, DMSc)<sup>1,2,3,8</sup>, Valma Harjutsalo (PhD)<sup>1,2,3</sup>, Per-Henrik Groop (MD, DMSc)<sup>1,2,3,9</sup> and Niina Sandholm (DSc in Tech)<sup>1,2,3</sup>, on behalf of the FinnDiane Study Group

*Underlined affiliation indicate department, where the work was performed*

1. Folkhälsan Institute of Genetics, Folkhälsan Research Center, Helsinki, Finland
2. Department of Nephrology, University of Helsinki and Helsinki University Hospital, Helsinki, Finland
3. Research Program for Clinical and Molecular Metabolism, Faculty of Medicine, University of Helsinki, Helsinki, Finland
4. Institute for Molecular Medicine Finland (FIMM), HiLIFE, University of Helsinki, Helsinki, Finland
5. Analytic and Translational Genetics Unit, Department of Medicine, Department of Neurology and Department of Psychiatry, Massachusetts General Hospital, Boston, MA, USA
6. The Stanley Center for Psychiatric Research and Program in Medical and Population Genetics, The Broad Institute of MIT and Harvard, Cambridge, MA, USA
7. Neurology, Helsinki University Hospital and University of Helsinki, Helsinki, Finland
8. Department of General Practice and Primary Health Care, University of Helsinki and Helsinki University Hospital, Helsinki, Finland
9. Department of Diabetes, Central Clinical School, Monash University, Melbourne, Victoria, Australia

**Word count: 8,299**

### **Corresponding Authors**

Per-Henrik Groop

Folkhälsan Research Center, and  
University of Helsinki and Helsinki  
University Hospital  
Haartmaninkatu 8, 00290 Helsinki  
Finland

Tel: +358 500 430436

Email: [per-henrik.groop@helsinki.fi](mailto:per-henrik.groop@helsinki.fi)

Niina Sandholm

Folkhälsan Research Center, and  
University of Helsinki and Helsinki  
University Hospital  
Haartmaninkatu 8, 00290 Helsinki  
Finland

Tel: +358 44 7881045

Email: [niina.sandholm@helsinki.fi](mailto:niina.sandholm@helsinki.fi)

## Abstract

**Aims:** Individuals with type 1 diabetes (T1D) carry a markedly increased risk of stroke, with distinct clinical and neuroimaging characteristics as compared to those without diabetes. Using whole-genome sequencing (WGS) and whole-exome sequencing (WES), we aimed to find rare and low-frequency genomic variants associated with stroke in T1D. The lead findings were followed up in various datasets to replicate the findings and to assess their specificity to diabetes.

**Methods and Results:** We studied stroke genetics in 1,051 individuals with T1D using WGS or WES. We analysed the genome with single-variant analyses, gene aggregate analyses, and aggregate analyses on genomic windows, enhancers and promoters. Furthermore, we attempted replication in T1D using a genome-wide association study (N=3,945) and direct genotyping (N=3,600), and in the general population from the FinnGen project and UK Biobank summary statistics. We identified a rare missense mutation on *SREBF1* associated with hemorrhagic stroke (rs114001633, p.Pro227Leu,  $p$ -value= $8.96 \times 10^{-9}$ ), which further replicated in T1D. Using gene aggregate analysis with protein altering or protein truncating variants, we identified exome-wide significant genes: *ANK1* and *LRRN1* displayed replication evidence in T1D, while *LRRN1*, *HAS1* and *UACA* replicated in the general population (UK Biobank). Furthermore, we performed sliding-window analyses and identified 14 genome-wide significant windows for stroke on 4q33-34.1, of which two replicated in T1D, and a suggestive genomic window on *LINC01500*, which replicated in T1D. Finally, with the regulatory region aggregate analyses, we identified a stroke-associated *TRPM2-AS* promoter ( $p$ -value= $5.78 \times 10^{-6}$ ), which we validated with an in vitro cell-based assay. *TRPM2* has been previously linked to ischemic stroke.

**Conclusions:** Here, we report the first genome-wide analysis on stroke in individuals with diabetes. We identified multiple stroke risk loci with evidence of replication: 4q33-34.1, *SREBF1*, and *ANK1* for stroke in T1D; and *HAS1*, *UACA*, *LRRN1*, *LINC01500*, and *TRPM2-AS* promoter for stroke potentially generalizable to the non-diabetic population.

## 1 **1. Introduction**

2 Stroke is a notable cause of mortality and long-term disability worldwide, with diabetes among  
3 the most important risk factors. Of note, the standardized incidence ratio is roughly 3-fold among  
4 individuals with type 1 diabetes (T1D) compared to the general population<sup>1</sup>. Furthermore, 537  
5 million adults live with diabetes today and the prevalence is rising (IDF Diabetes Atlas, 2021)<sup>2</sup>.  
6 Even though much of this trend is driven by an increase in obesity and insulin-resistant type 2  
7 diabetes (T2D), the incidence of insulin-dependent T1D has increased as well<sup>3</sup>. T1D is a lifelong  
8 condition caused by an autoimmune reaction towards the pancreas and treated with daily insulin  
9 injections. The strokes themselves may be of hemorrhagic (20%) or ischemic (80%) origin and  
10 classified into even more specific subtypes. Interestingly, the two diabetes types affect stroke risk  
11 differentially: T1D increases the risk of both ischemic- and hemorrhagic stroke<sup>4,5</sup>, while the risk  
12 imposed by T2D has been estimated more modest for hemorrhagic strokes<sup>5</sup>. Importantly, T1D  
13 predisposes individuals towards cerebral small-vessel disease and strokes of microvascular origin<sup>6</sup>.  
14 Diabetes causes also other complications, of which diabetic kidney disease (DKD) and severe  
15 retinopathy predict cerebrovascular disease in T1D<sup>7</sup>. Understanding stroke pathophysiology in  
16 diabetes is important for improving treatment and quality of life for individuals with T1D.

17 Stroke heritability has been estimated to vary between 30% and 40% in the general population<sup>8</sup>.  
18 Stroke heritability varies greatly depending on the subtype, with the largest heritabilities estimated  
19 for large artery atherosclerotic stroke and lobar intracranial hemorrhage, and the lowest for small  
20 vessel disease<sup>8</sup>. To date, 126 common genomic loci have been associated with stroke with genome-  
21 wide significance, although partly lacking external replication: 65 common genomic loci had been  
22 associated with stroke, a stroke subtype, or small vessel disease<sup>9</sup>, while recently, a large cross-  
23 ancestry genome-wide association study (GWAS) meta-analysis proposed 61 novel genomic loci

24 for stroke<sup>10</sup>. Associations at many of the known common stroke loci overlap with other  
25 cardiovascular phenotypes, e.g., coronary artery disease (CAD)<sup>8</sup>. Our previously study suggested  
26 a heritable component of stroke in individuals with T1D as a history of maternal stroke was  
27 associated with hemorrhagic stroke in T1D<sup>11</sup>. However, very few studies have investigated genetic  
28 risk factors for stroke in diabetes<sup>12–14</sup>, and no genome-wide studies in individuals with diabetes yet  
29 exist. On the other hand, genetic studies on CAD in diabetes have identified a few diabetes-specific  
30 loci<sup>15,16</sup>, although still pending external replication, and have replicated three known general  
31 population CAD risk loci in diabetes: *CDKN2B-AS1*, *PSRC1* and *LPA*<sup>14,15,17</sup>.

32 A substantial proportion of heritability remains unexplained for stroke<sup>8</sup>. Rare genetic variants with  
33 minor allele frequency (MAF) of  $\leq 1\%$  may significantly contribute to stroke heritability. In fact,  
34 some rare monogenic disorders have stroke as one of their manifestations<sup>8,9,18</sup>. In GWASs, the  
35 imputation accuracy of rare variants may be limited, and largely depends on the minor allele count  
36 (MAC) in the reference sample<sup>19</sup>. Rare variants can be reliably studied with next-generation  
37 sequencing-based techniques such as whole-genome sequencing (WGS) and whole-exome  
38 sequencing (WES). We have previously used WES to identify protein coding variants associated  
39 in lipid and apolipoprotein traits in T1D<sup>20</sup>. In the general population, novel stroke risk loci have  
40 been identified with WGS<sup>21</sup>. However, UK Biobank WES analysis for cardiometabolic traits did  
41 not discover exome-wide significant stroke risk genes<sup>22</sup>.

42 Historically, the Finnish population has been isolated and, thus, represents a unique genetic  
43 background with enrichment of low-frequency deleterious variants<sup>23</sup>, which may in part enable the  
44 discovery of rare disease-associated mutations. Here we studied genetics of stroke and its subtypes  
45 with WGS and WES in Finnish individuals with T1D with multiple statistical approaches by  
46 focusing on rare and low-frequency genomic variants. We aimed both to find stroke-risk loci

47 specific to individuals with T1D, and to identify risk loci generalizable to the non-diabetic  
48 population, since discovery of rare variants is more probable in a high-risk Finnish diabetic  
49 population. Finally, we performed cell-based *in vitro* experiments to further validate a discovered  
50 promoter region. Altogether, here we report the first genome-wide study on stroke genetics in  
51 diabetes.

## 52 **2. Methods**

### 53 **2.1 Ethical statement**

54 The study protocol has been approved by the ethics committee of the Helsinki and Uusimaa  
55 Hospital District (491/E5/2006, 238/13/03/00/2015, and HUS-3313-2018), and performed in  
56 accordance with the Declaration of Helsinki. All participants gave informed consent before  
57 participation.

### 58 **2.2 Materials**

59 The study is part of the Finnish Diabetic Nephropathy (FinnDiane) Study<sup>24</sup>. We studied WGS in  
60 571 and WES in 480 non-related individuals with T1D, entailing 112 and 74 stroke cases,  
61 respectively (**Table 1, Table S1, Figure S1 and S2**). Of note, patient selection from the large  
62 FinnDiane cohort to next-generation sequencing were originally designed for DKD. We collected  
63 stroke phenotypes from Finnish registries until the end of 2017 (**Table S2**). The identified cases  
64 were verified and classified into ischemic- and hemorrhagic strokes by trained neurologists using  
65 medical files and brain imaging data. For individuals without data verified by neurologists  
66 available ( $N_{\text{WGS}}=27$ ,  $N_{\text{WES}}=2$ ), we considered only the registry data, and excluded controls with  
67 intermediate stroke phenotypes. Importantly, we required stroke to have occurred after T1D  
68 diagnosis, and controls to have >35 years of age and >20 years of diabetes duration. We attempted  
69 replication in individuals with T1D within the FinnDiane GWAS data set ( $N=3,945$ , **Table S3 and**  
70 **S4, Figure S3**), restricted to high imputation quality variants ( $r^2>0.80$ ), and by directly genotyping  
71 twelve variants for replication ( $N=3,263$ , **Table S5, Figure S4**). Stroke phenotype within  
72 replication in T1D was defined accordingly.

### 73 **2.3 Study Design**

74 We performed single variant and variant aggregate analyses by meta-analysing WES and WGS  
75 whenever possible (**Figure 1**); and conducted stroke subtype association analyses for the lead  
76 findings. In addition, we conducted gene aggregate analyses with the minimal adjustment  
77 separately with protein altering variants (PAVs) and protein truncating variants (PTVs); and  
78 repeated the analyses with an additional DKD adjustment. Finally, we conducted minimally  
79 adjusted intergenic aggregate analyses within genomic windows by statistically up-weighting  
80 functionally important and rare variants; and within established enhancers and promoters by  
81 weighting variants according to rarity.

## 82 **2.4 Single variant analyses**

83 First, we analyzed the genome with an additive inheritance model. For variants available in WES  
84 and WGS data, we performed score test fixed-effect inverse variance based meta-analysis  
85 ( $MAC \geq 5$ , WES and WGS:  $MAC \geq 2$ ) using *rvtests* (version 20190205)<sup>25</sup> and *metal* (version  
86 20110325)<sup>26</sup>. For variants available only in one data set we utilized Firth regression ( $MAC \geq 5$ )<sup>25</sup>.  
87 Recessive variants can have high mutation severity in comparison to e.g., autosomal dominant  
88 variants<sup>27</sup>. Thus, we further analyzed the genome with a recessive inheritance model by exploiting  
89 a similar scheme (total homozygote minor allele carriers  $\geq 5$ ; WES and WGS homozygote carriers  
90  $\geq 2$ ). Autosomal recessive Firth regression was performed with *plink2* (version 20210420)<sup>28</sup>. The  
91 additive and recessive single variant analyses were adjusted for the calendar year of diabetes onset,  
92 sex, and two first genomic data principal components (i.e., minimal adjustment setting), and  
93 additionally for DKD.

## 94 **2.5 Gene aggregate analyses**



95 In order to improve statistical power for rare ( $MAF \leq 1\%$ ) and low-frequency ( $MAF \leq 5\%$ ) variants,  
96 we performed gene aggregate analyses with an optimal unified sequence kernel association test  
97 (SKAT-O) meta-analysis with MetaSKAT (version 0.81)<sup>29</sup>, separately within two distinct classes  
98 (**Table S6**): protein altering variants and protein truncating variants i.e., the more severe putative  
99 loss-of-function variants<sup>30</sup>. Only variable sites ( $MAC \geq 1$ ) were accepted into gene aggregate  
100 analysis, and the aggregate tests were required to entail at least two variants ( $N_{\text{variant}} \geq 2$ ), with a  
101 cumulative MAC (CMAC)  $\geq 5$ . Multiple testing correction, based on number of tested genes,  
102 resulted in significance thresholds of  $p\text{-value} < 4 \times 10^{-6}$  for PAVs ( $MAF \leq 1\%$  and  $MAF \leq 5\%$ ),  $p\text{-}$   
103  $\text{value} < 7 \times 10^{-5}$  for PTVs with  $MAF \leq 1\%$ , and  $p\text{-value} < 5 \times 10^{-5}$  for PTVs with  $MAF \leq 5\%$ . For the  
104 known Mendelian stroke risk genes<sup>18</sup>, we report results regardless of variant number or CMAC.

## 105 **2.6 Sliding-window and regulatory region aggregate analyses with whole-genome sequencing**

106 To increase statistical power for low-frequency and rare variants on intergenic regions, we  
107 performed minimally adjusted and functionally informed sliding-window analyses, i.e., aggregate  
108 analyses within 4,000 base pair (bp) regions – separated by 2,000 bps – with variants statistically  
109 weighted according to rarity and functional importance using STAAR-O (STAAR R package  
110 0.9.6)<sup>31,32</sup>. Functional importance was defined with Combined Annotation-Dependent Depletion  
111 (CADD) data<sup>32</sup> using variant MAF (to up-weight rarer variants), pre-computed CADD score, and  
112 the first annotation principal component from seven annotation classes (**Figure S5, Table S7**),  
113 calculated following guidelines<sup>31</sup>.

114 With the minimal adjustment setting, we studied established regulatory regions i.e., enhancers and  
115 promoters ( $N_{\text{variant}} \geq 2$ ,  $CMAC \geq 5$ ), as defined in FANTOM5 cap analysis of gene expression  
116 (CAGE) human data<sup>33</sup>, with promoters defined as the transcription start site (TSS) extended to  
117 1,000 bp. However, we utilized only allele frequencies as variant annotation, allowing us to include

118 more variants. With low-frequency variants, multiple testing corrected significance thresholds  
119 were  $p\text{-value} < 2.9 \times 10^{-7}$  and  $p\text{-value} < 2.6 \times 10^{-6}$  for promoters and enhancers, respectively. For rare  
120 variants, the thresholds were  $p\text{-value} < 3.5 \times 10^{-7}$  and  $p\text{-value} < 4.3 \times 10^{-6}$ , respectively.

## 121 **2.4 Replication**

122 Within the FinnDiane GWAS data, we attempted replication of genetic variants (rvtests  
123 20190205<sup>25</sup>) and had good statistical power (>80%) to detect a nominal association with an odds  
124 ratio (OR)  $\geq 2.5$  for additive low-frequency variants (MAF=1%) (**Figure S6**)<sup>34</sup>. However, for rare  
125 variants with MAF=0.1% and OR<9, we had only limited power to detect an association even with  
126 nominal significance ( $p\text{-value} < 0.05$ ). We attempted direct genotyping for replication for twelve  
127 variants, although minor allele carriers were observed only for seven of them (**Table S8**). Most  
128 variants within the aggregate discoveries were rare or ultra-rare (MAF $\approx$ 0.1%), making replication  
129 with imputed genomic data problematic. Nevertheless, we attempted replication within the  
130 FinnDiane GWAS data by including also the directly genotyped variants (SKAT-O, STAAR-O).  
131 We performed SKAT-O using GMMAT R package 1.3.2 by imputing missing genotypes to  
132 mean<sup>35</sup>, while intergenic aggregate analyses were performed similarly with STAAR R package<sup>31</sup>.  
133 Of note, relatedness in replication was accounted for with relatedness matrices instead of genomic  
134 principal components<sup>25,36</sup>. We attempted replication in the general population for genetic variants  
135 from the large-scale population-wide FinnGen project GWAS data (<https://www.finnngen.fi/en>)  
136 (**Table S9**), and for the gene aggregate discoveries from UK Biobank summary statistics<sup>22,37</sup>.

## 137 **2.5 Detailed Materials and Methods**

138 Detailed Materials and Methods are available in the Online Supplemental Material.

139

## 140 3. Results

### 141 3.1 Single variant analyses

142 We sought for genetic variants associated with stroke using WES and WGS data, and discovered  
143 a suggestive stroke-risk locus, 4q33-34.1, with minimally adjusted additive inheritance model  
144 (4:170787127,  $p$ -value= $8.83 \times 10^{-8}$ , MAF=3.7%, **Table 2, Figure S7**). We attempted replication,  
145 however, the variant 4:170787127 was unavailable for replication in the T1D specific GWAS and  
146 in the FinnGen general population GWAS summary statistics. A variant with the third lowest  $p$ -  
147 value on 4q33-34.1 did not replicate in T1D nor the general population (**Table 2**).

148 As DKD is a common diabetic complication that has been reported to predict incident stroke in  
149 T1D<sup>7</sup>, we performed additional analyses adjusted for DKD, and discovered a rare missense  
150 mutation on *SREBF1* exome-wide significantly ( $p$ -value $<3 \times 10^{-7}$ ) associated with stroke  
151 (rs114001633, p.Pro227Leu,  $p$ -value= $7.30 \times 10^{-8}$ , MAF=0.26%) (**Table 2, Figure S8**). In the stroke  
152 subtype analysis for the lead findings, this variant was genome-wide significant for hemorrhagic  
153 stroke ( $p$ -value= $8.96 \times 10^{-9}$ , MAC=3, **Table 2, Table S10**). However, rs114001633 did not pass the  
154 MAC threshold in the stroke subtype analysis (MAC $\geq$ 5), thus, the result must be interpreted with  
155 caution. Due to the rarity of the variant, we performed additional genotyping for replication,  
156 whereby the variant replicated for hemorrhagic stroke ( $p$ -value=0.02, N=3,263).

157 We further considered a recessive inheritance model and identified a genome-wide significant  
158 variant on *DHX8* intron with the minimal adjustment (rs1728177,  $p$ -value= $7.19 \times 10^{-9}$ , MAF=26%)  
159 (**Table 2, Figure S9**), which however did not replicate. Furthermore, we found two suggestive  
160 recessive loci, including one on 5' untranslated region of *LTB4R* (rs2224123,  $p$ -value= $4.77 \times 10^{-7}$ ,  
161 MAF=14%). rs2224123 did not replicate in T1D but was borderline significant in the general

162 population with an additive model (FinnGen GWAS:  $p$ -value=0.052). In the sequencing data,  
163 significance with an additive model was nominal ( $p$ -value=0.019), suggesting that rs2224123 acts  
164 recessively, but recessive data were not available for the replication look-up in the general  
165 population.

### 166 3.2 Gene aggregate analyses

167 To improve statistical power for rare and low-frequency variants, we performed the gene aggregate  
168 analyses. In the minimally adjusted model, low-frequency PAVs on *ANKK1* were significantly  
169 associated with stroke ( $p$ -value= $2.23 \times 10^{-6}$ , CMAC=247), and even more strongly with ischemic  
170 stroke ( $p$ -value= $1.31 \times 10^{-6}$ , CMAC=225) (**Figure 2A, Figure S10, Tables S11 and S12**).  
171 Furthermore, the aggregate of low-frequency or rare PAVs was suggestively associated with stroke  
172 in nine genes (**Figure 2A**). Of these, *TARBP2* associated significantly with ischemic stroke ( $p$ -  
173 value= $1.71 \times 10^{-7}$ , CMAC=5, MAF $\leq$ 1%), and *CLEC4M* with hemorrhagic stroke ( $p$ -  
174 value= $4.74 \times 10^{-15}$ , CMAC=11, MAF $\leq$ 1%).

175 After additional DKD adjustment, rare PAVs in *LRRN1* were significantly associated with stroke  
176 ( $p$ -value= $3.49 \times 10^{-6}$ , CMAC=15), more strongly with ischemic stroke ( $p$ -value= $8.69 \times 10^{-6}$ ,  
177 CMAC=12; **Figure 2B, Figure S11, Tables S11 and S13**). Furthermore, we identified suggestive  
178 genes, missed in the minimally adjusted model: *MAP3K12* and *MTRNR2L7*. In the stroke subtype  
179 analysis, rare PAVs in *MAP3K12* were significantly associated with ischemic stroke ( $p$ -  
180 value= $1.72 \times 10^{-7}$ , CMAC=17), and in *MTRNR2L7* with hemorrhagic stroke ( $p$ -value= $2.24 \times 10^{-6}$ ,  
181 CMAC=6). *MAP3K12* and *TARBP2* are located close to each other on the genome, thus, they may  
182 represent the same association signal through linkage disequilibrium (LD) or modifier effects onto  
183 the causal gene (**Figure S12**).

184 The aggregate of PTVs was suggestively associated with stroke in two genes including hyaluronan  
185 synthase 1 (*HAS1*; **Figure 2A, Table S12**). In analysis for stroke subtypes, *HAS1* was significantly  
186 associated with ischemic stroke ( $p$ -value= $7.39 \times 10^{-7}$ , CMAC=7). With additional DKD adjustment,  
187 rare PTVs in *HAS1* ( $p$ -value= $3.11 \times 10^{-5}$ ) and *UACA* ( $p$ -value= $6.77 \times 10^{-5}$ , CMAC=6), and low-  
188 frequency PTVs in *ARPC5* ( $p$ -value= $4.15 \times 10^{-5}$ , CMAC=39), were significantly associated with  
189 stroke (**Figure 2B, Table S13**).

### 190 **3.3 Replication of gene aggregate findings**

191 We attempted T1D specific replication within the FinnDiane GWAS data, by including also five  
192 directly genotyped variants, using the gene aggregate approach and by inspecting the exonic  
193 variants individually. Despite the uncertainty of genotype imputation and our limited statistical  
194 power for rare variants, *ANK1* and *LRRN1* showcased weak evidence of replication in T1D:  
195 Although *ANK1* did not reach significance with SKAT-O (**Table S14**), one of the available fifteen  
196 variants was significant for stroke (rs779805849,  $p$ -value=0.01) (**Table 3, Figure 3**), and two  
197 additional variants replicated for hemorrhagic stroke (rs146416859 and rs61753679,  $p$ -  
198 value<0.05) (**Tables S12**). *LRRN1* did not replicate in FinnDiane with rare PAVs ( $p$ -value=0.50,  
199  $N_{\text{variant}}=4$ ) (**Table S15**). However, when we extended the model to low-frequency PAVs (**Table**  
200 **S15**), thus improved statistical power and imputation quality, *LRRN1* replicated for ischemic  
201 stroke ( $p$ -value=0.039,  $N_{\text{variant}}=6$ ). *UACA* contained two rare PTVs associated with stroke, of which  
202 one replicated through genotyping ( $p$ -value=0.0030, **Table S13**). However, the variant was ultra-  
203 rare, and replication thus uncertain. We were unable to replicate *HAS1* in T1D due to missing data;  
204 we directly genotyped one variant but found no rare allele carriers.

205 We further attempted replication in the general population by look-ups from two UK Biobank  
206 WES studies<sup>22,37</sup> (**Tables S16 and S17**). Importantly, *HAS1* replicated for stroke in both studies  
207 with ultra-rare loss-of-function variants (MAF $\leq$ 0.1%: Jurgens et al.  $p$ -value=0.039<sup>22</sup>; Backman et  
208 al.  $p$ -value=0.035<sup>37</sup>), while *UACA* replicated only in the latter study (MAF $\leq$ 0.01%: Backman et  
209 al.  $p$ -value=0.035<sup>37</sup>). Finally, *LRRN1* replicated for stroke with an ultra-rare missense variant  
210 model (MAF $\leq$ 0.001%: Backman et al.  $p$ -value=0.026<sup>37</sup>), although not for ischemic stroke. Of note,  
211 *ANK1* did not replicate in the general population.

212 Out of the suggestive genes, *FOXO1*, *TARBP2*, and *MAP3K12* showcased weak replication in T1D  
213 (**Tables S12, S13, S14 and S15**). One variant within *FOXO1* replicated for hemorrhagic stroke ( $p$ -  
214 value=0.012), two within *MAP3K12* for hemorrhagic stroke ( $p$ -value=0.013); and *TARBP2*  
215 replicated for hemorrhagic stroke with SKAT-O ( $p$ -value=2.59 $\times$ 10<sup>-4</sup>). UK Biobank general  
216 population gene burden WES analysis look-ups supported stroke associations for *UTS2*,  
217 *MAP3K12*, and *FOXO1* (**Table S17**)<sup>22,37</sup>.

### 218 **3.4 Known Mendelian stroke genes in T1D**

219 Mutations on Mendelian stroke risk genes may for instance cause small vessel disease or cerebral  
220 cavernous malformations, which can eventually lead to stroke<sup>8</sup>. We inspected the association of  
221 17 autosomal genes previously linked to stroke through nonsynonymous mutations<sup>18</sup> (**Figure S13**).  
222 Rare PAVs on *KRIT1* associated with stroke ( $p$ -value=0.018) and ischemic stroke ( $p$ -  
223 value=0.0092). Furthermore, rare PAVs on *ADA2* and on *TREX1* associated with hemorrhagic  
224 stroke ( $p$ -value=0.027 and  $p$ -value=0.010, respectively). Loss-of-function mutations on *KRIT1*  
225 cause vascular malformations, while *ADA2* has been linked to autoinflammatory small vessel  
226 vasculitis and *TREX1* to small vessel disease<sup>8,18</sup>.

### 227 3.5 Sliding window analyses

228 To increase statistical power for low-frequency and rare variants on non-coding regulatory regions,  
229 we performed genome-wide sliding-window aggregate analyses. We found further evidence for  
230 the 4q33-34.1 genomic region as we discovered fourteen windows within the region, with a  
231 genome-wide significant association between an aggregate of low-frequency variants and stroke  
232 (MAF $\leq$ 5%; **Figure 4A, Table S18**). Importantly, two of these windows (4:170782001-  
233 170786000,  $p$ -value=3.40 $\times$ 10<sup>-8</sup>, CMAC=934; and 4:170784001-170786000,  $p$ -value=1.10 $\times$ 10<sup>-8</sup>,  
234 CMAC=1190) and ten individual variants within the 4q33-34.1 genomic region replicated for  
235 stroke in T1D (FinnDiane GWAS:  $p$ -value<0.05; **Table S19**). To identify the most likely effector  
236 genes for the 4q33-34.1, we inspected variant expression quantitative trait loci (eQTL) from GTEx  
237 Portal and eQTLGen Consortium<sup>38</sup>, and functional genomics from the 3D Genome Browser<sup>39</sup>.  
238 4q33-34.1 is located in the same topologically associating domain with distal promoters of  
239 *GALNTL6*, *MFAP3L* and *AADAT* in the frontal lobe and hippocampus (**Figure S14**). In addition,  
240 promoter capture high-throughput chromosome conformation capture (PCHi-C) links could be  
241 identified for a few individual variants, e.g., for *GALNTL6* in the hippocampus, and *AADAT* and  
242 *MFAP3L* in the dorsolateral prefrontal cortex. Several variants were eQTLs of *LINC02431* in  
243 testis, and one variant was an eQTL of *AADAT* in esophagus (normalized effect size [NES] =-  
244 0.55).

245 When we inspected rare variants (MAF $\leq$ 1%), we discovered multiple suggestive windows, e.g.,  
246 close to or within the *CNTN1*, *CNTN4*, *LINC01500*, and *TGOLN2* genes (**Figure 4B, Table S18**).  
247 In stroke subtype analysis, the *CNTN1* window was genome-wide significant for hemorrhagic  
248 stroke (12:40950001-40954000:  $p$ -value=2.10 $\times$ 10<sup>-8</sup>, CMAC=24). Interestingly, *CNTN1* and  
249 *CNTN4* are located on different chromosomes, but belong to the same contactin protein family;

250 however, replication is pending. The suggestive window near *LINC01500* (14:59004001-  
251 59008000:  $p$ -value= $2.53 \times 10^{-7}$ , CMAC=19) replicated for stroke in T1D (FinnDiane GWAS:  $p$ -  
252 value=0.01, CMAC=24). Four variants within the window were available in the FinnGen general  
253 population GWAS, and one replicated (rs1281241634,  $p$ -value=0.03) (**Table S19**). According to  
254 PChi-C, the *LINC01500* intronic window looped to the *DACT1* promoter on the dorsolateral  
255 prefrontal cortex (**Figure S15**). Finally, the *TGOLN2* window replicated for hemorrhagic stroke  
256 in T1D (FinnDiane GWAS:  $p$ -value=0.037).

### 257 **3.6 Promoters and enhancers**

258 As a more targeted approach to explore the non-coding genome, we studied rare and low-frequency  
259 variants on established regulatory regions. We discovered three enhancers with suggestive stroke-  
260 associated enrichment of rare or low-frequency variants within intronic regions of *TRPM3*,  
261 *LOC105378983*, and *BDNF*, encoding brain-derived neurotrophic factor (**Tables S20 and S21**,  
262 **Figure S16**). The *BDNF* enhancer was significant after multiple testing correction for ischemic  
263 stroke ( $p$ -value= $1.01 \times 10^{-6}$ ). Regional aggregate replications were not possible in the T1D specific  
264 GWAS ( $N_{\text{variant}} < 2$ ), and individual variants were missing or did not replicate. PChi-C linked the  
265 *BDNF* enhancer to its promoter on specific brain regions (**Figure S15**).

266 We did not identify stroke-associated promoters after multiple testing correction ( $p$ -value $< 3 \times 10^{-7}$ ,  
267 **Figure S17**). The strongest associations were two *TGOLN2* promoters ( $p$ -value= $5.60 \times 10^{-6}$ ,  
268 CMAC=9, MAF $\leq 1\%$ ), located on the previously mentioned *TGOLN2* window, and a *TRPM2-AS*  
269 promoter ( $p$ -value= $5.78 \times 10^{-6}$ , CMAC=33, MAF $\leq 1\%$ ; **Tables S22 and S23**). *TGOLN2* promoters  
270 did not replicate in T1D. *TRPM2-AS* promoter nearly replicated in T1D (FinnDiane GWAS:  $p$ -  
271 value=0.053). When we inspected variants individually, one out of nine available variants



272 replicated in the general population for ischemic stroke (FinnGen GWAS:  $p$ -value=0.038). In  
273 GTEx, rs762428 within the *TRPM2-AS* promoter associated significantly to *TRPM2* level in whole  
274 blood (NES=-0.63) and lungs (NES=-0.41,  $p$ <0.001), also nominally in other tissues such as the  
275 hypothalamus (NES=-0.42). *TRPM2* encodes a calcium-permeable and non-selective cation  
276 channel expressed mainly in the brain. The gene has been linked to ischemic stroke<sup>40</sup>, and belongs  
277 to the same protein subfamily as the above mentioned *TRPM3*. *TRPM2* inhibitors have been  
278 proposed as a drug target for central nervous system diseases<sup>41</sup>, thus, our results suggested that  
279 these inhibitors could be beneficial also for stroke in T1D.

280 Our cell-based experimental research on the *TRPM2-AS* promoter detected *TRPM2-AS* and  
281 *TRPM2* transcripts specifically in HELA cells among tested cell-lines (**Figure S18**). Luciferase  
282 promoter analysis of the *TRPM2-AS* promoter in HELA cells indicated strong promoter activity;  
283 although, the most strongly stroke-associated variant, rs753589764, did not significantly affect  
284 luciferase activity under normal cell culture conditions ( $p$ -value=0.27, 22 technical repeats).  
285 However, we cannot rule out a variant effect under cellular stress, e.g., oxidative stress.

## 286 4. Discussion

287 Stroke heritability has been estimated to range between 30% and 40%, but the genomic loci  
288 identified thus far explain only a small fraction of heritability<sup>8</sup>. One potential explanation  
289 underlying the missing heritability are rare variants missed by GWAS. Therefore, we performed  
290 WES and WGS in a total of 1,051 Finnish individuals with T1D to discover rare and low-frequency  
291 variants associated with stroke and its major subtypes, either specific for T1D, or generalizable to  
292 the non-diabetic population. We identified multiple significant loci with evidence of replication,  
293 including protein altering or truncating variants on *ANK1*, *HASI*, *UACA*, and *LRRN1*, as well as a  
294 4q33-34.1 intergenic region.

295 With single variant analyses, we identified a missense mutation on *SREBF1* (rs114001633,  
296 p.Pro227Leu) which was genome-wide significantly associated with hemorrhagic stroke, and  
297 further replicated. As the variant was ultra-rare, and we had a relatively small number of  
298 hemorrhagic stroke cases, further replication is needed in T1D to conform this finding. *SREBF1*  
299 encodes a transcription factor involved in lipid metabolism and insulin signaling<sup>42</sup>.

300 Gene aggregate tests (SKAT-O) detected four genes with significant stroke-associated burden of  
301 PAVs (*ANK1* and *LRRN1*) or PTVs (*HASI* and *UACA*) and evidence of replication; *LRRN1*, *HASI*,  
302 and *UACA* after adjustment for DKD. *ANK1* did not replicate in T1D with SKAT-O, however, one  
303 out of the fifteen available variants replicated for stroke in T1D (rs779805849, p.Val136Glu). Of  
304 note, SIFT and PolyPhen predicted many *ANK1* variants as deleterious<sup>43,44</sup>. *ANK1* encodes  
305 ankyrin-1, within which mutations cause hereditary spherocytosis<sup>45</sup>. Previous genome-wide  
306 association studies have linked the gene to T2D<sup>46</sup>, while another gene from the ankyrin protein  
307 family, *ANK2*, is a previously identified stroke risk locus<sup>47</sup>.

308 Rare PAVs in *LRRNI* associated with ischemic stroke. *LRRNI* did not replicate with the  
309 corresponding model in T1D, however; with a model extended to low-frequency PAVs, *LRRNI*  
310 replicated for ischemic stroke. Rare variant replication is problematic with GWAS data due to the  
311 uncertainty of the imputation, which may explain the need of increasing the allele frequency  
312 threshold to observe a successful replication. Furthermore, *LRRNI* replicated with ultra-rare  
313 variants in the general population<sup>37</sup>. *LRRNI* encodes leucine rich repeat neuronal protein 1, with a  
314 brain-enriched expression profile.

315 *HASI* consistently replicated in the general population<sup>22,37</sup>, while *UACA* replicated in one study  
316 with ultra-rare variants<sup>37</sup>. *HASI* encodes an enzyme producing hyaluronan and with expression  
317 induced by inflammation and glycemic stress<sup>48</sup>. Of note, an increased hyaluronan turnover has  
318 been suggested to follow ischemic stroke<sup>49</sup>. *HASI* replication was not feasible in T1D due to absent  
319 mutation carriers, thus, a diabetes-specific replication is pending. Nevertheless, *HASI* PTVs may  
320 be of particular importance in T1D, as dysregulation of endothelial glycocalyx hyaluronan has  
321 been suggested to contribute to diabetic complications<sup>50</sup>. Finally, it must be noted that PTVs have  
322 not been functionally confirmed as loss-of-function, but the annotations are predictions; PTV at  
323 the beginning of a gene is likely more severe than at the end, and in fact, PTVs closer to the *HASI*  
324 transcription start site were more strongly associated with stroke.

325 To increase statistical power on regulatory regions, we performed statistical aggregate tests in  
326 genomic windows, enhancers and promoters<sup>31,33</sup>. Of note, we extended genomic window length  
327 from the default to increase statistical power, which however also reduced precision as the causal  
328 region might be narrower. We found fourteen genome-wide significant stroke-associated windows  
329 with low-frequency variants on 4q33-34.1, of which two replicated for stroke in T1D. According  
330 to eQTLs and PCHi-C interactions, 4q33-34.1 variants most likely target *GALNTL6*, *MFAP3L* or

331 *AADAT*. We also discovered a suggestive stroke-associated window within *LINC01500*, which  
332 replicated for stroke in T1D. According to PCHi-C, the *LINC01500* window targets a promoter of  
333 *DACT1*. Finally, we identified a suggestive stroke-associated promoter of *TRPM2-AS*, which  
334 nearly replicated in T1D ( $p$ -value=0.053). Importantly, transient receptor melastatin 2 (*TRPM2*)  
335 has been previously associated with ischemic stroke<sup>40,41</sup>. Our functional cell-based assay validated  
336 the *TRPM2-AS* region promoter activity. However, the most strongly stroke-associated variant,  
337 rs753589764, did not associate with *TRPM2-AS* promoter activity in normal cell culture  
338 conditions.

339 Limitations of the study include the limited statistical power at the discovery stage, especially for  
340 the stroke subtypes, and replication of rare variants with imputed GWAS data. We were able to  
341 improve the statistical power on exomes by meta-analyzing WES and WGS, and we performed  
342 stroke-subtype specific analyses only for a limited number of suggestive findings to avoid spurious  
343 signals due to unstable statistical estimates. To further improve statistical power, we performed  
344 statistical aggregate tests on gene exons and on intergenic regions, i.e., enhancers, promoters, and  
345 genomic windows. Of note, we studied only transcribed enhancers, and thus, some enhancers could  
346 have been missed. We defined promoters with an arbitrarily selected 1,000 bp extension  
347 downstream TSS, which may not have always been optimal as the promoter lengths vary. A further  
348 limitation is the lack of sequencing-based replication data in individuals with T1D. Instead, we  
349 sought for replication by combining available data sources, i.e., FinnGen (Finnish general  
350 population GWAS), UK Biobank (general population WES), and FinnDiane (GWAS and  
351 genotyping in Finnish individuals with T1D).

352 The strengths of this study include a well characterized cohort and comprehensively performed  
353 single variant and aggregate analyses both for the coding and non-coding regions of the genome.

354 Stroke is a challenging phenotype to address with ICD codes and many loci associated with rare  
355 stroke phenotypes may go unnoticed even with large population-wide genetic studies. We  
356 performed analyses for well-defined stroke phenotypes verified by trained neurologists.  
357 Furthermore, as we conducted the analyses in specific high-risk individuals from an isolated  
358 population, thus with lesser genetic and phenotypic diversity, we had improved statistical  
359 opportunities to identify genetic risk loci.

360 In conclusion, we studied rare and low-frequency stroke-associated variants with WES and WGS  
361 in individuals with T1D and report the first genome-wide study on stroke genetics in diabetes. The  
362 results highlight 4q33-34.1, *SREBF1*, and *ANK1* for stroke in T1D; and *HASI*, *UACA*, *LRRN1*,  
363 *LINC01500*, and *TRPM2-AS* promoter as stroke risk loci that likely generalize to the non-diabetic  
364 population.

## **Data availability**

Gene aggregate test stroke summary statistics are provided in the Supplementary Data. The sequencing data supporting the current study cannot be deposited in a public repository because of restrictions due to the study consent. The Readers may propose collaboration to research the individual level data with correspondence with the lead investigator.

## **Funding**

This work was supported by grants from Folkhälsan Research Foundation; Wilhelm and Else Stockmann Foundation; “Liv och Hälsa” Society; Sigrid Juselius Foundation (220027); Helsinki University Central Hospital Research Funds [TYH2018207]; Novo Nordisk Foundation [NNF OC0013659], Academy of Finland [299200 and 316664]; European Foundation for the Study of Diabetes (EFSD) Young Investigator Research Award funds; an EFSD award supported by EFSD/Sanofi European Diabetes Research Programme in Macrovascular Complications; Finnish Foundation for Cardiovascular Research; and the Finnish Diabetes Research Foundation.

## **Author’s contributions**

A.A.A. analyzed the data, wrote the manuscript, and contributed to interpretation of the data, conception and study design, and pre-processing of whole exome sequencing data. J.H. pre-processed the whole-genome sequencing data and contributed to computational analyses and conception and study design. N.S. contributed to acquisition of phenotypic and genotypic data, conception and study design, manuscript writing and interpretation of data. A.Ku. performed lab experiments. A.S, E.K., A.Ky., and A.P. contributed to acquisition and data processing of genetic data. S.H.-H. and A.Y. contributed to acquisition of phenotypic data. J.P., L.M.T., V.H. and P.-H.G. contributed to interpretation of data, acquisition of phenotypic data, and to conception and

study design. J.H., A.Ku., A.S., S.H.-H., A.Y., E.K., A.Ky., A.P., J.P., L.M.T, V.H., P.-H.G., and N.S. revised the manuscript critically for important intellectual content. All authors gave final approval of the version to be submitted and any revised version.

## **Acknowledgements**

We are indebted to the late Carol Forsblom (1964–2022), the international coordinator of the FinnDiane Study Group, for his considerable contribution. The skilled technical assistance of Heli Krigsman, Hanna Olanne, Maikki Parkkonen, Mira Rahkonen, Anna Sandelin, and Jaana Tuomikangas is gratefully acknowledged. We also want to acknowledge all the physicians and nurses at each FinnDiane center participating in the recruitment and characterization of the individuals with T1D (**Table S24**) and the FinnDiane participants. In addition, we acknowledge the participants and investigators of the FinnGen study. We acknowledge that the ELIXIR Finland node, hosted at the CSC – IT Center for Science for ICT resources, enabling the WES and WGS data processing. Finally, we want to acknowledge Bert Vogelstein and Jukka Kallijärvi for material provided for the *in vitro* promoter experiments: pBV-Luc plasmids (Bert Vogelstein) and renilla control plasmid (Kallijärvi lab, Folkhälsan Research Center).

We utilized data provided by GTEx. The Genotype-Tissue Expression (GTEx) Project was supported by the Common Fund of the Office of the Director of the National Institutes of Health, and by NCI, NHGRI, NHLBI, NIDA, NIMH, and NINDS. The data reported here were obtained from the GTEx Portal on 01/04/2022: <https://gtexportal.org/home/>.

## **Conflict of interests**

P-H G has received investigator-initiated research grants from Eli Lilly and Roche, is an advisory board member for AbbVie, Astellas, AstraZeneca, Bayer, Boehringer Ingelheim, Cebix, Eli Lilly,

Janssen, Medscape, Merck Sharp & Dohme, Mundipharma, Nestlé, Novartis, Novo Nordisk and Sanofi; and has received lecture fees from AstraZeneca, Bayer, Boehringer Ingelheim, Eli Lilly, Elo Water, Genzyme, Merck Sharp & Dohme, Medscape, Novartis, Novo Nordisk, PeerVoice, Sanofi, and Sciarc. Other authors declare no competing interests.



## References

1. Harjutsalo V, Barlovic DP, Gordin D, Forsblom C, King G, Groop P-H. Presence and Determinants of Cardiovascular Disease and Mortality in Individuals With Type 1 Diabetes of Long Duration: The FinnDiane 50 Years of Diabetes Study. *Diabetes Care*. 2021;44:1885–1893.
2. Sun H, Saeedi P, Karuranga S, Pinkepank M, Ogurtsova K, Duncan BB, Stein C, Basit A, Chan JCN, Mbanya JC, et al. IDF Diabetes Atlas: Global, regional and country-level diabetes prevalence estimates for 2021 and projections for 2045. *Diabetes Res. Clin. Pract.* 2022;183.
3. Forlenza GP, Rewers M. The epidemic of type 1 diabetes: what is it telling us? *Curr. Opin. Endocrinol. Diabetes Obes.* 2011;18:248–251.
4. Ståhl CH, Lind M, Svensson A, Gudbjörnsdóttir S, Mårtensson A, Rosengren A. Glycaemic control and excess risk of ischaemic and haemorrhagic stroke in patients with type 1 diabetes: a cohort study of 33 453 patients. *J. Intern. Med.* 2017;281:261–272.
5. Janghorbani M, Hu FB, Willett WC, Li TY, Manson JE, Logroscino G, Rexrode KM. Prospective study of type 1 and type 2 diabetes and risk of stroke subtypes: the Nurses' Health Study. *Diabetes Care*. 2007;30:1730–1735.
6. Thorn LM, Shams S, Gordin D, Liebkind R, Forsblom C, Summanen P, Hägg-Holmberg S, Tatlisumak T, Salonen O, Putaala J, et al. Clinical and MRI Features of Cerebral Small-Vessel Disease in Type 1 Diabetes. *Diabetes Care*. 2019;42:327–330.
7. Hägg S, Thorn LM, Putaala J, Liebkind R, Harjutsalo V, Forsblom CM, Gordin D, Tatlisumak T, Groop P-H, FinnDiane Study Group. Incidence of stroke according to presence of diabetic nephropathy and severe diabetic retinopathy in patients with type 1 diabetes. *Diabetes Care*. 2013;36:4140–4146.
8. Dichgans M, Pulit SL, Rosand J. Stroke genetics: discovery, biology, and clinical applications. *Lancet Neurol.* 2019;18:587–599.
9. Debette S, Markus HS. Stroke Genetics: Discovery, Insight Into Mechanisms, and Clinical Perspectives. *Circ. Res.* 2022;130:1095–1111.
10. Mishra A, Malik R, Hachiya T, Jürgenson T, Namba S, Posner DC, Kamanu FK, Koido M, Le Grand Q, Shi M, et al. Stroke genetics informs drug discovery and risk prediction across ancestries. *Nature*. 2022;611:115–123.
11. Ylinen A, Hägg-Holmberg S, Eriksson MI, Forsblom C, Harjutsalo V, Putaala J, Groop P-H, Thorn LM. The impact of parental risk factors on the risk of stroke in type 1 diabetes. *Acta Diabetol.* 2021;58:911–917.
12. Syreeni A, Dahlström EH, Hägg-Holmberg S, Forsblom C, Eriksson MI, Harjutsalo V, Putaala J, Groop P-H, Sandholm N, Thorn LM. Haptoglobin Genotype Does Not Confer a Risk of Stroke in Type 1 Diabetes. *Diabetes*. 2022;71:2728–2738.

13. Dahlström EH, Saksi J, Forsblom C, Uglebjerg N, Mars N, Thorn LM, Harjutsalo V, Rossing P, Ahluwalia TS, Lindsberg PJ, et al. The Low-Expression Variant of FABP4 Is Associated With Cardiovascular Disease in Type 1 Diabetes. *Diabetes*. 2021;70:2391–2401.
14. Vujkovic M, Keaton JM, Lynch JA, Miller DR, Zhou J, Tcheandjieu C, Huffman JE, Assimes TL, Lorenz K, Zhu X, et al. Discovery of 318 new risk loci for type 2 diabetes and related vascular outcomes among 1.4 million participants in a multi-ancestry meta-analysis. *Nat. Genet*. 2020;52:680–691.
15. Antikainen AAV, Sandholm N, Trégouët D-A, Charmet R, McKnight AJ, Ahluwalia TS, Syreeni A, Valo E, Forsblom C, Gordin D, et al. Genome-wide association study on coronary artery disease in type 1 diabetes suggests beta-defensin 127 as a risk locus. *Cardiovasc. Res*. 2021;117:600–612.
16. Qi L, Qi Q, Prudente S, Mendonca C, Andreozzi F, di Pietro N, Sturma M, Novelli V, Mannino GC, Formoso G, et al. Association Between a Genetic Variant Related to Glutamic Acid Metabolism and Coronary Heart Disease in Individuals With Type 2 Diabetes. *JAMA*. 2013;310:821–828.
17. Fall T, Gustafsson S, Orho-Melander M, Ingelsson E. Genome-wide association study of coronary artery disease among individuals with diabetes: the UK Biobank. *Diabetologia*. 2018;61:2174–2179.
18. Grami N, Chong M, Lali R, Mohammadi-Shemirani P, Henshall DE, Rannikmäe K, Paré G. Global assessment of Mendelian stroke genetic prevalence in 101 635 individuals from 7 ethnic groups. *Stroke*. 2020;51:1290–1293.
19. Si Y, Vanderwerff B, Zöllner S. Why are rare variants hard to impute? Coalescent models reveal theoretical limits in existing algorithms. *Genetics*. 2021;217:iyab011.
20. Sandholm N, Hotakainen R, Haukka JK, Jansson Sigfrids F, Dahlström EH, Antikainen AA, Valo E, Syreeni A, Kilpeläinen E, Kytölä A, et al. Whole-exome sequencing identifies novel protein-altering variants associated with serum apolipoprotein and lipid concentrations. *Genome Med*. 2022;14:132.
21. Hu Y, Haessler JW, Manansala R, Wiggins KL, Moscati A, Beiser A, Heard-Costa NL, Sarnowski C, Raffield LM, Chung J, et al. Whole-Genome Sequencing Association Analyses of Stroke and Its Subtypes in Ancestrally Diverse Populations From Trans-Omics for Precision Medicine Project. *Stroke*. 2022;53:875–885.
22. Jurgens SJ, Choi SH, Morrill VN, Chaffin M, Pirruccello JP, Halford JL, Weng L-C, Nauffal V, Roselli C, Hall AW, et al. Analysis of rare genetic variation underlying cardiometabolic diseases and traits among 200,000 individuals in the UK Biobank. *Nat. Genet*. 2022;54:240–250.
23. Locke AE, Steinberg KM, Chiang CWK, Service SK, Havulinna AS, Stell L, Pirinen M, Abel HJ, Chiang CC, Fulton RS, et al. Exome sequencing of Finnish isolates enhances rare-variant association power. *Nature*. 2019;572:323–328.
24. Thorn LM, Forsblom C, Fagerudd J, Thomas MC, Pettersson-Fernholm K, Saraheimo M, Wadén J, Rönneback M, Rosengård-Bärlund M, Björkesten C-G af, et al. Metabolic Syndrome in Type 1 Diabetes: Association with diabetic nephropathy and glycemic control (the FinnDiane study). *Diabetes Care*. 2005;28:2019–2024.

25. Zhan X, Hu Y, Li B, Abecasis GR, Liu DJ. RVTESTS: an efficient and comprehensive tool for rare variant association analysis using sequence data. *Bioinformatics*. 2016;32:1423–1426.
26. Willer CJ, Li Y, Abecasis GR. METAL: fast and efficient meta-analysis of genomewide association scans. *Bioinformatics*. 2010;26:2190–2191.
27. Pei J, Kinch LN, Otwinowski Z, Grishin NV. Mutation severity spectrum of rare alleles in the human genome is predictive of disease type. *PLoS Comput. Biol.* 2020;16:e1007775.
28. Chang CC, Chow CC, Tellier LC, Vattikuti S, Purcell SM, Lee JJ. Second-generation PLINK: rising to the challenge of larger and richer datasets. *Gigascience*. 2015;4:s13742-015.
29. Lee S, Teslovich TM, Boehnke M, Lin X. General framework for meta-analysis of rare variants in sequencing association studies. *Am. J. Hum. Genet.* 2013;93:42–53.
30. Rivas MA, Pirinen M, Conrad DF, Lek M, Tsang EK, Karczewski KJ, Maller JB, Kukurba KR, DeLuca DS, Fromer M, et al. Effect of predicted protein-truncating genetic variants on the human transcriptome. *Science*. 2015;348:666–669.
31. Li X, Li Z, Zhou H, Gaynor SM, Liu Y, Chen H, Sun R, Dey R, Arnett DK, Aslibekyan S, et al. Dynamic incorporation of multiple in silico functional annotations empowers rare variant association analysis of large whole-genome sequencing studies at scale. *Nat. Genet.* 2020;52:969–983.
32. Rentzsch P, Witten D, Cooper GM, Shendure J, Kircher M. CADD: predicting the deleteriousness of variants throughout the human genome. *Nucleic Acids Res.* 2019;47:D886–D894.
33. Abugessaisa I, Noguchi S, Hasegawa A, Harshbarger J, Kondo A, Lizio M, Severin J, Carninci P, Kawaji H, Kasukawa T. FANTOM5 CAGE profiles of human and mouse reprocessed for GRCh38 and GRCh38 genome assemblies. *Sci. Data*. 2017;4:1–10.
34. Moore CM, Jacobson SA, Fingerlin TE. Power and Sample Size Calculations for Genetic Association Studies in the Presence of Genetic Model Misspecification. *Hum. Hered.* 2019;84:256–271.
35. Chen H, Huffman JE, Brody JA, Wang C, Lee S, Li Z, Gogarten SM, Sofer T, Bielak LF, Bis JC, et al. Efficient Variant Set Mixed Model Association Tests for Continuous and Binary Traits in Large-Scale Whole-Genome Sequencing Studies. *Am. J. Hum. Genet.* 2019;104:260–274.
36. Zhou X, Stephens M. Genome-wide efficient mixed-model analysis for association studies. *Nat. Genet.* 2012;44:821–824.
37. Backman JD, Li AH, Marcketta A, Sun D, Mbatchou J, Kessler MD, Benner C, Liu D, Locke AE, Balasubramanian S, et al. Exome sequencing and analysis of 454,787 UK Biobank participants. *Nature*. 2021;599:628–634.
38. Vösa U, Claringbould A, Westra H-J, Bonder MJ, Deelen P, Zeng B, Kirsten H, Saha A, Kreuzhuber R, Yazar S, et al. Large-scale cis- and trans-eQTL analyses identify thousands of genetic loci and polygenic scores that regulate blood gene expression. *Nat. Genet.* 2021;53:1300–1310.

39. Wang Y, Song F, Zhang B, Zhang L, Xu J, Kuang D, Li D, Choudhary MNK, Li Y, Hu M, et al. The 3D Genome Browser: a web-based browser for visualizing 3D genome organization and long-range chromatin interactions. *Genome Biol.* 2018;19:151.
40. Zong P, Lin Q, Feng J, Yue L. A Systemic Review of the Integral Role of TRPM2 in Ischemic Stroke: From Upstream Risk Factors to Ultimate Neuronal Death. *Cells.* 2022;11:491.
41. Belrose JC, Jackson MF. TRPM2: a candidate therapeutic target for treating neurological diseases. *Acta Pharmacol. Sin.* 2018;39:722–732.
42. DeBose-Boyd RA, Ye J. SREBPs in Lipid Metabolism, Insulin Signaling, and Beyond. *Trends Biochem. Sci.* 2018;43:358–368.
43. Adzhubei IA, Schmidt S, Peshkin L, Ramensky VE, Gerasimova A, Bork P, Kondrashov AS, Sunyaev SR. A method and server for predicting damaging missense mutations. *Nat. Methods.* 2010;7:248–249.
44. Kumar P, Henikoff S, Ng PC. Predicting the effects of coding non-synonymous variants on protein function using the SIFT algorithm. *Nat. Protoc.* 2009;4:1073–1081.
45. Park J, Jeong D-C, Yoo J, Jang W, Chae H, Kim J, Kwon A, Choi H, Lee JW, Chung N-G, et al. Mutational characteristics of ANK1 and SPTB genes in hereditary spherocytosis. *Clin. Genet.* 2016;90:69–78.
46. Yan R, Lai S, Yang Y, Shi H, Cai Z, Sorrentino V, Du H, Chen H. A novel type 2 diabetes risk allele increases the promoter activity of the muscle-specific small ankyrin 1 gene. *Sci. Rep.* 2016;6:25105.
47. Malik R, Chauhan G, Traylor M, Sargurupremraj M, Okada Y, Mishra A, Rutten-Jacobs L, Giese A-K, van der Laan SW, Gretarsdottir S, et al. Multiancestry genome-wide association study of 520,000 subjects identifies 32 loci associated with stroke and stroke subtypes. *Nat. Genet.* 2018;50:524–537.
48. Siiskonen H, Oikari S, Pasonen-Seppänen S, Rilla K. Hyaluronan Synthase 1: A Mysterious Enzyme with Unexpected Functions. *Front. Immunol.* 2015;6:1–11.
49. Katarzyna Greda A, Nowicka D. Hyaluronidase inhibition accelerates functional recovery from stroke in the mouse brain. *J. Neurochem.* 2021;157:781–801.
50. Wang G, Tiemeier GL, van den Berg BM, Rabelink TJ. Endothelial Glycocalyx Hyaluronan: Regulation and Role in Prevention of Diabetic Complications. *Am. J. Pathol.* 2020;190:781–790.

## Tables

**Table 1:** Clinical characteristics of study participants in the next-generation sequencing data sets.

|                                         | WES               |                  |                        | WGS              |                  |                        |
|-----------------------------------------|-------------------|------------------|------------------------|------------------|------------------|------------------------|
|                                         | Cases             | Controls         | <i>p</i> -value        | Cases            | Controls         | <i>p</i> -value        |
| N                                       | 74                | 406              |                        | 112              | 459              |                        |
| Hemorrhagic/Ischemic                    | 22/49             |                  |                        | 26/64            |                  |                        |
| CVD death <2017<br>(yes/no, % yes)      | 35/39 (47%)       | 66/340 (16%)     | $2.92 \times 10^{-8}$  | 58/54 (52%)      | 83/376<br>(18%)  | $2.61 \times 10^{-12}$ |
| Sex (male/female, %<br>males)           | 39/35 (53%)       | 182/224<br>(45%) | 0.25                   | 80/32 (71%)      | 236/223<br>(51%) | 0.00013                |
| Age (years)                             | 48.39 (11.89)     | 60.69 (11.13)    | $7.08 \times 10^{-13}$ | 51.08<br>(10.29) | 58.70 (9.61)     | $3.52 \times 10^{-11}$ |
| T1D duration (years)                    | 33.6 (10.45)      | 47.49 (9.84)     | $5.89 \times 10^{-18}$ | 36.16 (9.81)     | 46.00 (8.14)     | $6.34 \times 10^{-18}$ |
| Calendar year of T1D<br>onset*          | 1969.5<br>(11.75) | 1968 (11)        | 0.29                   | 1968<br>(10.25)  | 1969 (9)         | 0.80                   |
| T1D onset age (years)                   | 14.79 (6.64)      | 13.21 (7.27)     | 0.066                  | 14.92 (8.93)     | 12.69 (7.75)     | 0.016                  |
| Weighted mean HbA <sub>1c</sub><br>(%)* | 9.00 (2)          | 8.51 (1.4)       | 0.0037                 | 8.86 (1.76)      | 8.34 (1.57)      | 0.00097                |
| HbA <sub>1c</sub> count*                | 19 (28.5)         | 29 (26)          | 0.0038                 | 19 (30)          | 29 (30)          | 0.011                  |
| DKD (yes/no, yes-%)                     | 52/22 (70%)       | 201/205<br>(50%) | 0.00098                | 87/25 (78%)      | 206/253<br>(45%) | $2.49 \times 10^{-10}$ |

*Weighted mean HbA<sub>1c</sub> is calculated until the stroke event or the end of follow-up. DKD: diabetic kidney disease, defined as end-stage renal disease (ESRD), macro- or microalbuminuria. Mean (standard deviation, SD), \*Median (interquartile range, IQR). Student's t-test, Wilcoxon signed rank test or Fisher's exact test.*

**Table 2:** Lead variants discovered with single variant association analyses.

|                                                                | SNP ID            | Position    | Potential target gene                               | Data | REF /ALT  | MAF   | $N_{Hom}$ | OR [95% CI]                      | $I^2$ | $p$ -value            | GWAS OR ( $p$ -value) | FinnGen OR ( $p$ -value) |
|----------------------------------------------------------------|-------------------|-------------|-----------------------------------------------------|------|-----------|-------|-----------|----------------------------------|-------|-----------------------|-----------------------|--------------------------|
| <b>Stroke</b><br>Additive model,<br>minimal<br>adjustment      | rs376936219       | 4:170784011 | <i>AADAT</i> ,<br><i>MFAP3L</i> ,<br><i>GALNTL6</i> | WGS  | G/T       | 4.6%  | -         | 4.77 [2.66-8.60]                 | -     | $1.67 \times 10^{-7}$ | 0.88<br>(0.35)        | 1.03 (0.34)              |
|                                                                | rs4435704         | 4:170787127 |                                                     | WGS  | T/C       | 3.7%  | -         | 6.04 [3.12-11.67]                | -     | $8.83 \times 10^{-8}$ | -                     | -                        |
|                                                                | rs4401420         | 4:170787143 |                                                     | WGS  | C/T       | 4.1%  | -         | 5.16 [2.79-9.55]                 | -     | $1.76 \times 10^{-7}$ | -                     | -                        |
| <b>Stroke</b><br>Additive model,<br>DKD adjustment             | rs114001633       | 17:17819659 | <i>SREBF1</i><br>(p.Pro227Leu)                      | ++   | G/A       | 0.3%  | -         | 3804.35 [189.15-76515.45]        | 35%   | $7.30 \times 10^{-8}$ | 1.41<br>(0.30)        | 1.03 (0.87)              |
| <b>Hemorrhagic stroke</b><br>Additive model,<br>DKD adjustment | rs114001633<br>** | 17:17819659 | <i>SREBF1</i><br>(p.Pro227Leu)                      | ++   | G/A       | 0.2%  | -         | 41632847<br>[105163-16482021208] | 96%   | $8.96 \times 10^{-9}$ | 42.70<br>(0.023)      | 0.74 (0.32)              |
| <b>Stroke</b><br>Recessive model,<br>minimal<br>adjustment     | rs2224123         | 14:24313752 | <i>LTB4R*</i>                                       | ++   | A/T       | 14.1% | 26        | 16.75 [5.59-50.17]               | 77%   | $4.77 \times 10^{-7}$ | 0.97<br>(0.92)        | 1.03<br>(0.052)          |
|                                                                | rs1728177         | 17:43605161 | <i>DHX8</i> ,<br><i>MEOX1</i> ,<br><i>ETV4*</i>     | WGS  | G/A       | 26.3% | 46        | 6.94 [3.60-13.37]                | -     | $7.19 \times 10^{-9}$ | 1.03<br>(0.87)        | 0.99 (0.59)              |
| <b>Stroke</b><br>Recessive model,<br>DKD adjustment            | rs76073237        | 1:160870594 | <i>ITLN1</i> , <i>CD244</i>                         | WGS  | GTA/<br>G | 36.7% | 66        | 4.69 [2.58-8.54]                 | -     | $4.00 \times 10^{-7}$ | -                     | -                        |

*Multiple variants reported from a locus if the lead variant was unavailable in GWAS replication (in such case, we report the closest variants). If the variant was discovered already in the minimal model, we do not report DKD adjusted results. In addition, stroke subtype association is reported, if the association is genome-wide significant with a successful replication. Variants are in Hardy-Weinberg equilibrium ( $p$ -value > 0.05).  $N_{Hom}$  = Number of recessive carriers, ++ Meta-analysis with positive minor allele effect direction, \*Multiple eQTLs or dorsolateral prefrontal cortex PCHi-C links, \*\*Did not pass MAC threshold ( $MAC \leq 5$ ). REF = Reference allele, ALT = Alternative allele,  $I^2$  = Meta-analysis heterogeneity estimate, OR = Odds ratio, CI = confidence interval.*

**Table 3.** Protein altering- and protein truncating variants in significant stroke risk genes according to significance thresholds corrected by the number of genes within designated models.

| Gene (Model)                         | SNP ID                  | Consequence (SIFT/PolyPhen)          | REF/ALT            | Sequencing        |                             |         | FinnDiane GWAS |                   | FinnGen GWAS |              |
|--------------------------------------|-------------------------|--------------------------------------|--------------------|-------------------|-----------------------------|---------|----------------|-------------------|--------------|--------------|
|                                      |                         |                                      |                    | MAC               | OR [95% CI]                 | p-value | MAC            | OR (p-value)      | MAC          | OR (p-value) |
| <i>HAS1</i> (Minimal: PTV ≤1%)       | 19:51713664             | p.Tyr500* (-/-)                      | G/T                | -/≤3              | 0.31 [0.0050-18.88]         | 0.57    |                |                   |              |              |
|                                      | 19:51713853             | p.Cys437* (-/-)                      | G/T                | -/≤3              | 0.32 [0.00062-162.99]       | 0.72    |                |                   |              |              |
|                                      | rs1396240967            | Splice donor (-/-)                   | C/T                | -/≤3              | 901.45 [3.53-230240.57]     | 0.016   |                |                   |              |              |
|                                      | rs58597876              | Splice donor (-/-)                   | C/CACAC<br>ACACACA | ≤3/-              | 369.81 [17.90-7640.36]      | 0.00013 |                |                   |              |              |
| <i>LRRN1</i> (Minimal + DKD: PAV≤1%) | rs755350940             | 5 prime UTR (-/-)                    | C/T                | ≤3/≤3             | 4.45 [0.17-114.63]          | 0.37    | 20             | 1.05 (0.93)       | 1483         | 0.98 (0.85)  |
|                                      | rs142381203             | p.Arg185Cys (0.00/0.79)              | C/T                | ≤3/-              | 67.29 [0.67-6787.51]        | 0.074   | ≤3             | 0.82 (0.46**)     |              |              |
|                                      | rs147007969             | p.Thr190Ile (0.18/0.54)              | C/T                | ≤3/4              | 33.55 [3.92-287.48]         | 0.0014  | 25             | 0.75 (0.61)       | 1431         | 0.94 (0.57)  |
|                                      | rs141825989             | p.Arg305Cys (0.01/0.80)              | C/T                | -/≤3              | 439.22 [2.19-88150.42]      | 0.025   | ≤3             | 0.52 (0.81*)      |              |              |
|                                      | rs770349026             | p.Arg390His (0.00/0.98)              | G/A                | -/≤3              | 28.22 [0.44-1817.11]        | 0.12    |                |                   |              |              |
|                                      | rs747455683             | p.Thr442Met (0.12/0.65)              | C/T                | ≤3/-              | 2351.95 [6.73-821987.12]    | 0.0094  |                |                   | 281          | 0.75 (0.35)  |
| <i>ANK1</i> (Minimal: PAV≤5%)        | rs750580242             | p.Ser896Arg (0.40/0.11)              | A/T                | ≤3/-              | 24.02 [0.35-1656.73]        | 0.14    |                |                   |              |              |
|                                      | rs751965455             | p.Met1607Ile (0.06/0.07)             | C/T                | -/≤3              | 0.29 [0.0017-49.02]         | 0.64    |                |                   |              |              |
|                                      | rs146416859             | p.Arg1577Cys (0.03/0.01)             | G/A                | ≤3/≤3             | 6.18 [0.20-194.73]          | 0.30    | 15             | 1.66 (0.49)       | 716          | 1.01 (0.94)  |
|                                      | rs34664882              | p.Ala114Val (0.04/0.74)              | G/A                | 13/15             | 3.16 [1.14-8.76]            | 0.028   | 141            | 1.12 (0.63)       | 8250         | 0.93 (0.17)  |
|                                      | rs199760447             | p.Val1450Ile (1.00/0.00)             | C/T                | -/≤3              | 5229.13 [11.67-2344071.66]  | 0.0060  | 6              | 0.26 (0.24)       | 257          | 1.12 (0.70)  |
|                                      | rs201439151             | p.Tyr1386His (0.01/0.50)             | A/G                | ≤3/≤3             | 0.28 [0.016-4.63]           | 0.37    | 11             | 0.73 (0.71)       | 917          | 0.76 (0.062) |
|                                      | rs10093583              | p.Met159Val (0.40/0.00)              | T/C                | 4/≤3              | 2.62 [0.33-20.88]           | 0.36    | 41             | 0.80 (0.61)       | 2757         | 1.03 (0.72)  |
|                                      | rs779805849             | p.Val136Glu (0.00/0.99)              | A/T                | ≤3/-              | 3.48 [0.15-78.91]           | 0.43    | 5              | 24.19 (0.017)     | 684          | 0.85 (0.34)  |
|                                      | rs148275567             | p.Arg89Cys (0.00/1.00)               | G/A                | ≤3/4              | 8.50 [1.36-53.12]           | 0.022   | 11             | 0.98 (0.98)       | 1056         | 0.85 (0.23)  |
|                                      | rs117516263             | Structural interaction variant (-/-) | G/A                | 19/12             | 0.87 [0.35-2.17]            | 0.77    | 114            | 1.39 (0.22)       | 6980         | 0.92 (0.11)  |
|                                      | rs202226361             | p.Val1048Met (0.00/1.00)             | C/T                | 5/-               | 0.84 [0.099-7.09]           | 0.87    | 21             | 3.30 (0.055)      | 1510         | 1.01 (0.97)  |
|                                      | rs767717861             | p.Thr1022Met (0.00/0.93)             | G/A                | -/≤3              | 11695.97 [20.42-6698538.99] | 0.0038  |                |                   |              |              |
|                                      | 8:41696385              | p.Pro302Thr (0.00/1.00)              | G/T                | -/≤3              | 0.30 [0.012-7.50]           | 0.46    |                |                   |              |              |
|                                      | 8:41696393              | p.Ala299Glu (1.00/0.91)              | G/T                | -/≤3              | 6.74 [0.21-211.38]          | 0.28    |                |                   |              |              |
|                                      | rs2304877               | p.Arg619His (0.01/0.003)             | C/T                | 32/41             | 1.35 [0.72-2.54]            | 0.35    | 317            | 1.00 (0.98)       | 20065        | 1.00 (0.91)  |
|                                      | rs61753679              | Structural interaction variant (-/-) | G/T                | 20/22             | 0.92 [0.40-2.08]            | 0.84    | 120            | 1.21 (0.47)       | 8343         | 0.99 (0.79)  |
|                                      | rs34387324              | Structural interaction variant (-/-) | G/A                | ≤3/≤3             | 0.30 [0.012-7.35]           | 0.46    | 10             | 1.10 (0.92)       | 1206         | 1.19 (0.18)  |
|                                      | rs142690258             | p.Asn528Ser (0.84/0.001)             | T/C                | 7/5               | 4.25 [0.99-18.25]           | 0.051   | 21             | 0.69 (0.55)       | 2327         | 0.97 (0.72)  |
|                                      | rs140085544             | p.Val463Ile (0.04/0.38)              | C/T                | ≤3/≤3             | 143.88 [4.63-4468.82]       | 0.0046  | 17             | 2.43 (0.20)       | 1101         | 0.93 (0.60)  |
|                                      | rs769619019             | p.Met476Leu (0.11/0.99)              | T/A                | -/≤3              | 0.30 [0.0015-58.17]         | 0.65    |                |                   |              |              |
|                                      | rs1015648649            | p.Ala461Val (0.00/1.00)              | G/A                | ≤3/-              | 0.31 [0.0010-94.56]         | 0.69    |                |                   |              |              |
|                                      | 8:41717683              | p.His442Arg (0.00/1.00)              | T/C                | ≤3/-              | 0.31 [0.00099-99.04]        | 0.69    |                |                   |              |              |
|                                      | rs1364511169            | p.His416Arg (1.00/1.00)              | T/C                | ≤3/-              | 0.27 [0.0025-29.56]         | 0.59    |                |                   |              |              |
| rs61735313                           | p.Asn251Lys (0.01/1.00) | G/T                                  | 11/4               | 4.11 [1.08-15.61] | 0.038                       | 77      | 0.82 (0.53)    | 3998              | 0.99 (0.85)  |              |
| <i>UACA</i> (Minimal + DKD: PTV≤1%)  | rs781623644             | p.Gln1116* (-/-)                     | G/A                | ≤3/≤3             | 154.93 [9.27-2590.28]       | 0.00045 | 7              | 0.51 (0.57)       | 301          | 1.10 (0.72)  |
|                                      | rs185763236             | Splice donor (-/-)                   | C/A                | ≤3/-              | 234.86 [1.47-37624.10]      | 0.035   | ≤3             | 4084.69 (0.0030*) |              |              |

\*Genotyped, \*\*Genotyped and tested without kinship adjustment. Consequence: Amino acid alteration matching the SIFT score, SIFT=0-1 (deleterious-tolerated), and PolyPhen=0-1 (benign-damaging); if multiple transcript alterations, we report the most severe consequence score, i.e., PolyPhen score may not

*match consequence. MAC=MAC in WGS / MAC in WES, REF=Reference allele, ALT=Alternative allele, OR=Odds ratio, CI=confidence interval.*



## Figures

**Figure 1: Study design.**

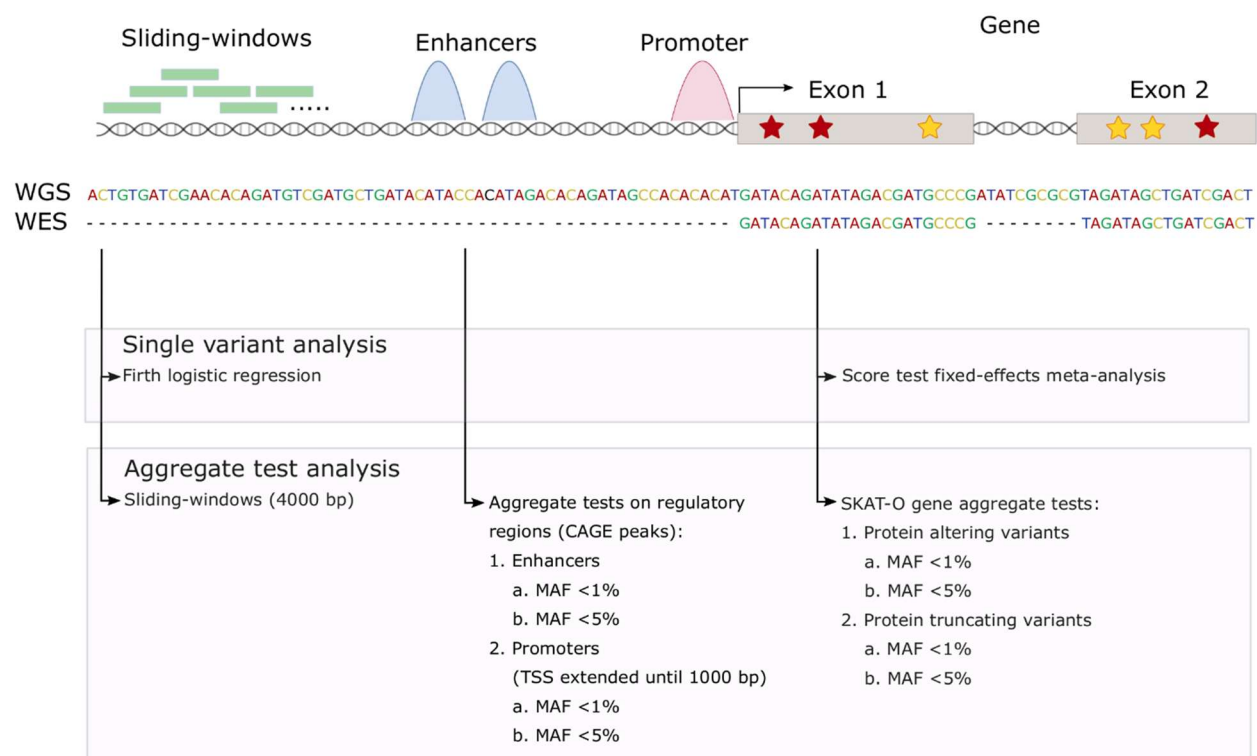

**Figure 2: Discovered genes with the SKAT-O gene aggregate tests. A. Minimal adjustment, B.** Additional adjustment for diabetic kidney disease. The color indicates the  $-\log_{10}(p\text{-value})$ , with darker color indicating more significant finding. Only the rare variant model ( $\text{MAF} \leq 1\%$ ) is reported, if no low-frequency variants ( $1\% < \text{MAF} \leq 5\%$ ) were available in the gene. Bonferroni corrected significance thresholds:  $4 \times 10^{-6}$  (protein altering variant,  $\text{PAV} \leq 1\%$ ),  $4 \times 10^{-6}$  ( $\text{PAV} \leq 5\%$ ),  $5 \times 10^{-5}$  (protein truncating variant,  $\text{PTV} \leq 5\%$ ), and  $7 \times 10^{-5}$  ( $\text{PTV} \leq 1\%$ ). Number of variants and CMAC given based on the combined stroke phenotype.

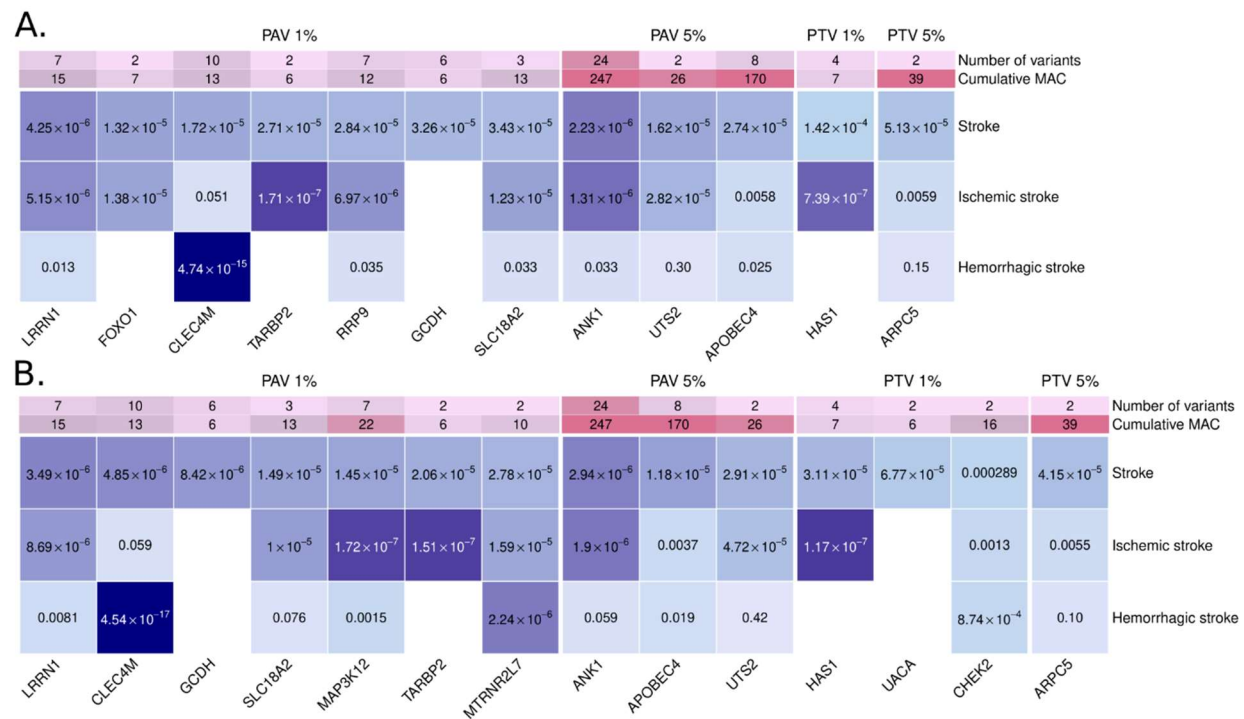

**Figure 3: Variants in significant stroke-associated genes after multiple testing correction (SKAT-O) showcasing evidence of replication. \*Diabetic kidney disease adjusted stroke model.**

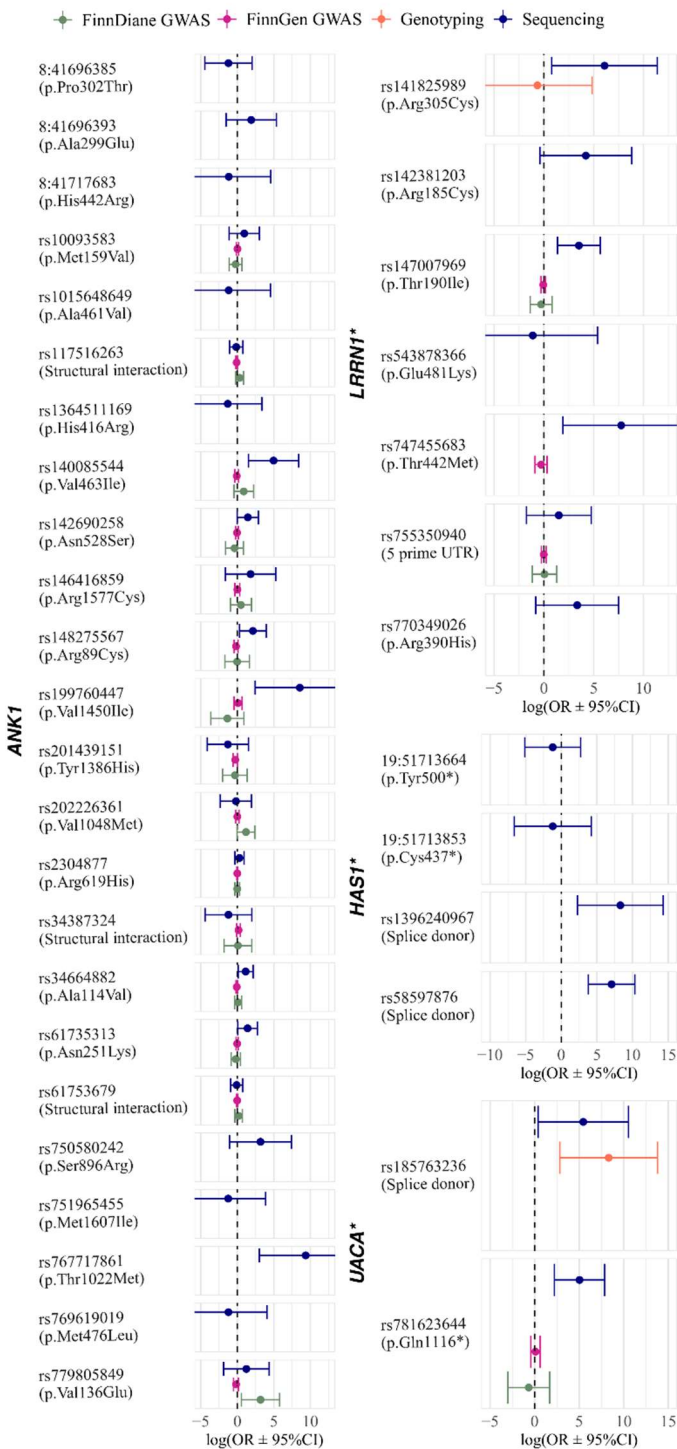

**Figure 4: STAAR sliding-window analyses. A.**  $MAF \leq 5\%$  (inserted QQ-plot without the 4q33-34.1 region), and **B.**  $MAF \leq 1\%$ .

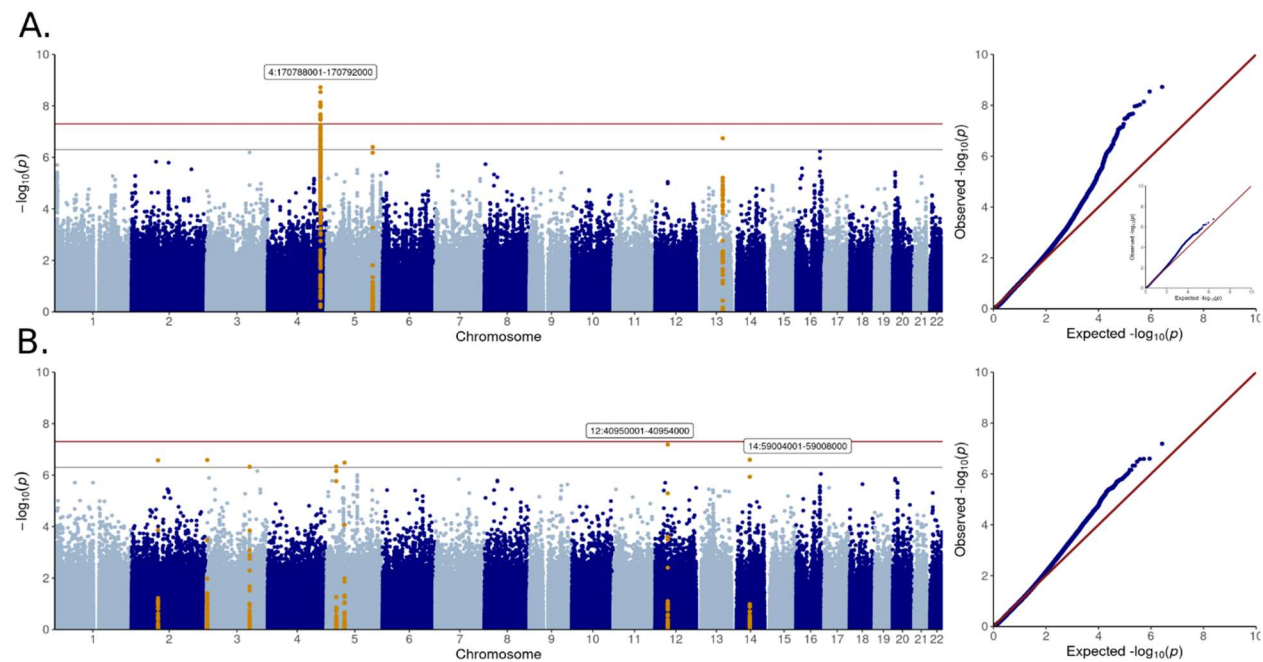

Source: https://medrxiv.org/content/10.1101/2022.11.30.22282752v2.full.pdf
